# Supplementary material for: Rational synthesis of Ni3(HCOO)6/CNT ellipsoids with enhanced lithium storage performance: inspired by the time evolution of the growth process of a nickel formate framework
Source: Royal Society of Chemistry journal article supplement (doi:10.1039/c7dt01033h), 2017-01-01
Supplement: c7dt01033h1.pdf [file c7dt01033h1.pdf]

## Supporting Information

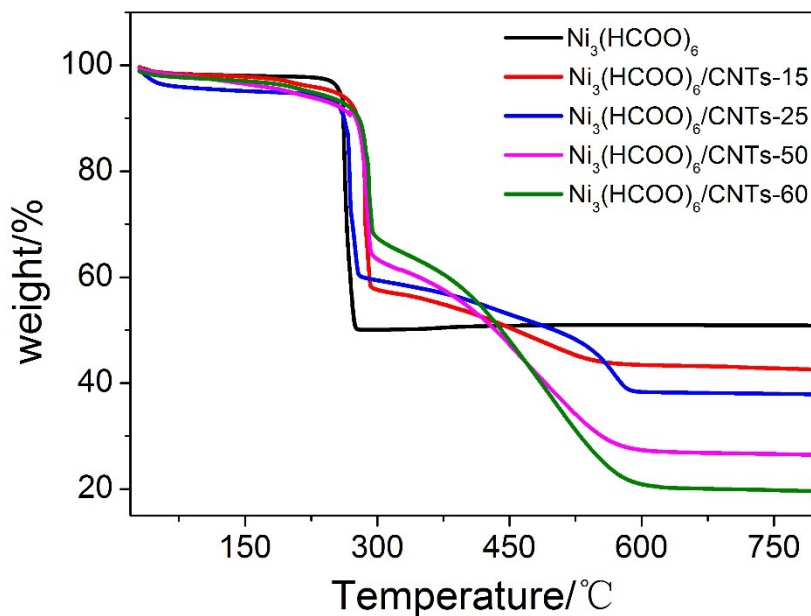

Fig. S1 TGA of  $\text{Ni}_3(\text{HCOO})_6/\text{CNTs}$  and pristine  $\text{Ni}_3(\text{HCOO})_6$ .

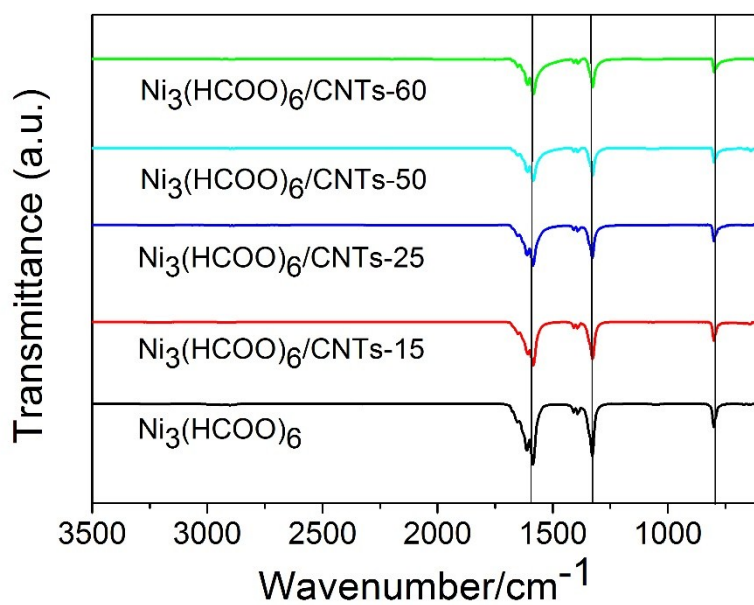

Fig. S2 IR spectra of the ellipsoidal  $[\text{Ni}_3(\text{HCOO})_6]$  and  $\text{Ni}_3(\text{HCOO})_6/\text{CNTs-n}$  ( $n=15, 25, 50, 60$ ).

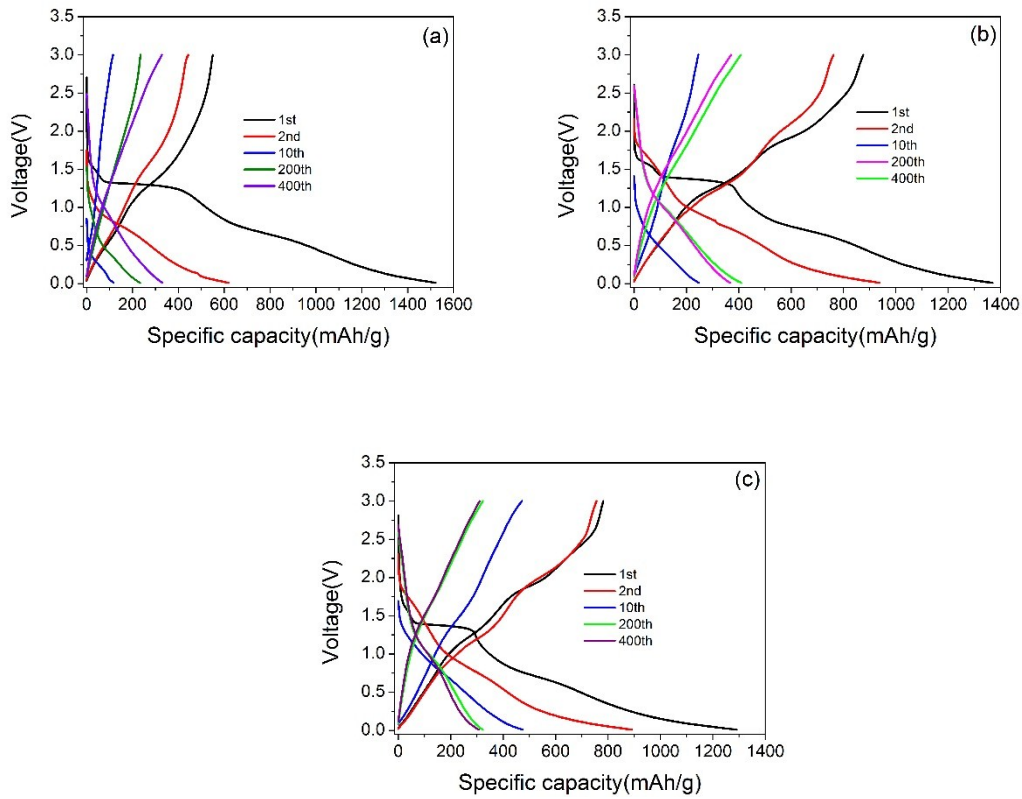

Fig. S3 (a) Discharge/charge curves of  $\text{Ni}_3(\text{HCOO})_6/\text{CNTs-15}$ ; (b) Discharge/charge curves of  $\text{Ni}_3(\text{HCOO})_6/\text{CNTs-25}$ ; (c) Discharge/charge curves of  $\text{Ni}_3(\text{HCOO})_6/\text{CNTs-60}$ .

60.

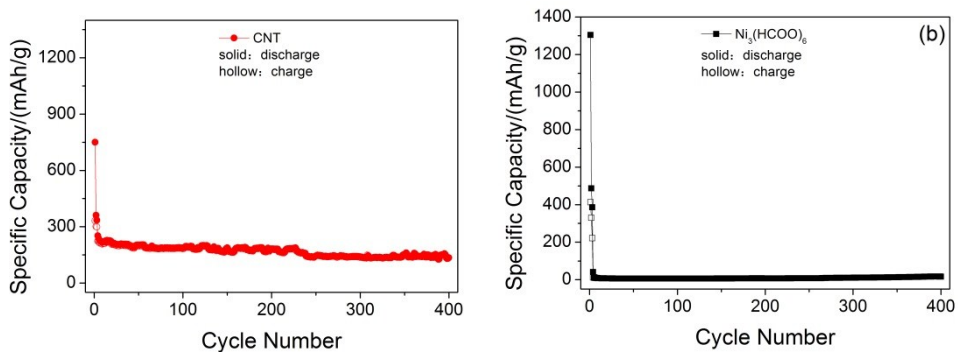

Fig. S4 (a) Cycling performance of CNTs; (b) Cycling performance of pristine  $\text{Ni}_3(\text{HCOO})_6$ .
